1 **Aggressiveness as a latent personality trait of domestic**

2 **dogs: testing local independence and measurement**

3 **invariance**

4 Conor Goold<sup>1\*</sup>, Ruth C. Newberry<sup>1</sup>

5 <sup>1</sup> Department of Animal and Aquacultural Sciences, Norwegian University of Life

6 Sciences, Ås, Akershus, Norway

7 \* Corresponding author: [conor.gould@nmbu.no](mailto:conor.gould@nmbu.no) (CG)

## 8 **Abstract**

9 Studies of animal personality attempt to uncover underlying or 'latent' personality traits  
10 that explain broad patterns of behaviour, often by applying latent variable statistical  
11 models (e.g. factor analysis) to multivariate data sets. Two integral, but infrequently  
12 confirmed, assumptions of popular latent variable models in animal personality are: i)  
13 behavioural variables are independent (i.e. uncorrelated) conditional on the latent  
14 personality traits they reflect (*local independence*), and ii) personality traits are  
15 associated with behavioural variables in the same way across individuals or groups of  
16 individuals (*measurement invariance*). We tested these assumptions using observations  
17 of aggression in four age classes (4 - 10 months, 10 months - 3 years, 3 - 6 years, over 6  
18 years) of male and female shelter dogs (N = 4,743) in 11 different contexts. A structural  
19 equation model supported the hypothesis of two correlated ( $\rho = 0.25$ ;  $p < 0.001$ )  
20 personality traits underlying aggression across contexts: aggressiveness towards people  
21 and aggressiveness towards dogs (comparative fit index: 0.97; Tucker-Lewis index: 0.96;  
22 root mean square error of approximation: 0.03). Aggression across contexts was  
23 moderately repeatable (towards people: ICC = 0.479, 95% CI: 0.466, 0.491; towards  
24 dogs: ICC = 0.303, 95% CI: 0.291, 0.315). However, certain contexts related to  
25 aggressiveness towards people (but not dogs) shared significant residual correlations  
26 unaccounted for by latent levels of aggressiveness. Furthermore, aggressiveness  
27 towards people and dogs in different contexts interacted with sex and age. Thus, sex  
28 and age differences in displays of aggression were not simple functions of underlying  
29 aggressiveness. Our results illustrate that the robustness of traits in latent variable

30 models must be critically assessed before making conclusions about the effects of, or  
31 factors influencing, animal personality. Our findings are of concern because inaccurate  
32 'aggressive personality' trait attributions can be costly to dogs, recipients of aggression  
33 and society in general.

34

35 *Key words:* animal personality assessment; agonistic behaviour; shelter dogs;  
36 measurement bias; behavioural phenotyping

## 37 Introduction

38 Studies of non-human animal personality, defined by relatively consistent between-  
39 individual differences in behaviour, demonstrate that organisation of the behavioural  
40 phenotype is markedly hierarchical and non-independent [1–3]. Observed patterns of  
41 behaviour can be explained by broad behavioural dimensions or personality traits,  
42 including boldness, activity, exploration, sociability and aggressiveness [4], which are  
43 further inter-correlated to form behavioural syndromes [5]. To interpret the complexity  
44 inherent in behavioural phenotypes, personality traits and behavioural syndromes are  
45 frequently inferred using latent variable statistical models, which reduce two or more  
46 measured variables (the *manifest* variables) into one or more lower-dimensional  
47 variables (the *latent* variables). Latent variable models have been popular in human  
48 psychology for over a century [6], and now comprise a flexible set of methods to derive  
49 lower-order variables from multivariate data sets [7].

50

51 Because latent variables are unobserved, latent variable models require careful  
52 application and interpretation [8–10]. In animal personality, many studies use *formative*  
53 models, such as principal components analysis, that construct composite variables  
54 comprised of linear combinations of manifest variables. However, formative models  
55 impose only weak assumptions about the relationships between latent variables and  
56 manifest variables [11]. As such, their utility for inferring the nature of personality traits  
57 has been criticised in both animals [12,13] and humans [9,11,14,15]. Alternatively,

58 researchers have used *reflective* models, such as factor analysis and, increasingly,  
59 confirmatory approaches such as structural equation modelling. These models regress  
60 measured behaviours on one or more latent variables [11], incorporating measurement  
61 error and possibilities to compare *a priori* competing hypotheses (for applications in  
62 animal personality, see [1,16–18]).

63

64 Whilst reflective models offer a powerful framework to probe the latent variable  
65 structure of behaviour, they impose certain constraints on the interpretation and  
66 modelling of latent variables that have received scrutiny in human psychology but are  
67 rarely discussed in studies of animal personality. Two foundational assumptions of these  
68 models are *local independence* and *measurement invariance*. Local independence  
69 implies that manifest variables should be independent of each other conditional on the  
70 latent variables [19,20]. For example, given a latent variable  $\theta$  and two binary manifest  
71 variables  $Y_1$  and  $Y_2$  that can take the values 0 and 1, the item response theory model  
72 asserts that  $P(Y_1 = 1, Y_2 = 1 | \theta) = P(Y_1 = 1 | \theta)P(Y_2 = 1 | \theta)$ . As such, the latent  
73 variables should screen off any dependence between manifest variables. Measurement  
74 invariance, on the other hand, implies that the latent variables function the same (i.e.  
75 are invariant or equivalent) in different subsets of a population or in the same  
76 individuals through time [21–24]. That is, given a fixed level  $x$  on a latent variable  $\theta$ ,  
77 denoted  $\theta_x$ , the expected values of manifest variables  $Y_i$ , from  $i = 1$  to  $N$ , should be the  
78 same across a grouping factor  $\pi$  (e.g. sex or different populations), expressed as  
79  $E(Y_i | \theta_x) = E(Y_i | \theta_x, \pi)$ . Intuitively, violations of either local independence or

80 measurement invariance imply that the latent variables do not completely explain  
81 variation in manifest variables, which may lead to artefactual conclusions about the  
82 differences between individuals as a function of trait scores [25–27]. More generally,  
83 investigating violations of local independence and measurement invariance can identify  
84 measurement biases that can be rectified to improve the quality of personality  
85 assessments.

86

87 The use of latent variable modelling is particularly common in studies of personality in  
88 domestic dogs (*Canis lupus familiaris*), where the collection of data sets comprised of  
89 multiple behavioural variables (e.g. questionnaires) has been prevalent for decades [28–  
90 30]. Personality assessments are important both in applied settings to predict the  
91 behaviour of dogs at future time points [31] and also to elucidate behavioural traits  
92 pertinent to dogs' domestication history [32,33]. Decomposing behaviour into a smaller  
93 number of underlying dimensions that explain variation in measured behaviours aids in  
94 measuring hypothesised stable behavioural features of individuals from which  
95 predictions of future behaviour are estimable and upon which selection may have been  
96 focused. Nonetheless, research on personality in dogs has led to different numbers and  
97 composition of hypothesised personality traits with little clear consensus on how such  
98 traits should be compared within and between studies [34–36]. Most importantly, the  
99 predictive value of personality assessments in dogs has been inconsistent [31,37–41],  
100 perhaps most prominently in shelter dog personality assessments (e.g. see [31] for a  
101 review). The predictive validity of personality assessments is of particular concern in

102 tests of aggression, where aggression is frequently divided into different aggressiveness  
103 traits, including owner-, stranger-, dog- or animal-directed factors [29,35,42,43]. Based  
104 on such assessments, if falsely labelled as aggressive in one or more of these categories,  
105 the dog may be euthanised unnecessarily whereas, if falsely considered unaggressive,  
106 the dog may be more likely to be placed in situations leading to harmful behaviour. Dog  
107 bites are a serious public health concern [44], especially for animal shelters rehoming  
108 dogs to new owners, and aggressive behaviour is undesirable to many organisations  
109 using dogs for various working roles [45].

110

111 Why has the prediction of dog personality been difficult? On one hand, the validation of  
112 personality tests has been criticised for lacking rigour [34,46], meaning the targeted  
113 traits may not be under measurement as intended. In particular, commonly-used  
114 'battery assessments', comprised of different sub-tests conducted sequentially, may not  
115 be valid if the responses to one sub-test alter how the animal responds to subsequent  
116 sub-tests given an underlying trait (e.g. if test items are 'invasive' to subsequent items;  
117 [47]). Moreover, test batteries can be "inherently stress-inducing for test animals" ([31]:  
118 10), so behavioural responses may be functions of the targeted traits and stress  
119 responses. On the other hand, personality may simply not be generalisable across all  
120 individuals if individual behaviour is differentially dependent on factors such as age (e.g.  
121 [35,40]) or fluctuating environmental conditions (e.g. behaviour in a shelter versus out  
122 of a shelter; [48]). In reflective latent variable modelling, greater attention to the  
123 assumptions of local independence and measurement invariance is, thus, warranted.

124 For aggressiveness specifically, if aggression shown in one context or test item increases  
125 the likelihood of aggression in others [48], local independence would be violated.  
126 Further, interactive effects between aggressiveness and demographic variables, such as  
127 age, sex, breed or neuter status (e.g. [49–51]), would violate the assumption of  
128 measurement invariance. Whilst van den Berg *et al.* [18] reported measurement  
129 invariance of the *stranger-directed aggression* factor from the Canine Behaviour and  
130 Research Questionnaire (C-BARQ; [29]) across three breeds of dogs, measurement  
131 invariance of aggression assessed with respect to other factors has not been evaluated  
132 and, to our knowledge, no authors have confirmed local independence between  
133 manifest variables in animal personality assessments.

134

135 In this paper, we assessed local independence and measurement invariance of  
136 aggressiveness using a large sample of data on inter-context aggression in shelter dogs.  
137 First, we sought to decompose observations of aggression towards people and dogs  
138 across contexts into separate aggressiveness traits. Secondly, we assessed whether  
139 aggression in different contexts remained associated beyond that explained by latent  
140 levels of aggressiveness, testing local independence. Thirdly, we investigated whether  
141 the probability of aggression in different contexts believed to be underpinned by the  
142 same aggressiveness trait was measurement invariant with respect to sex and age  
143 groups. While it may be unrealistic for measurement invariance to hold in all instances,  
144 it is important to establish whether it holds across basic biological variables such as age



145 and sex which are generally applicable to dog populations undergoing personality  
146 assessment.

147

## 148 **Materials & Methods**

### 149 **Subjects**

150 Observational data on the occurrence of aggression in 4,743 dogs were gathered from  
151 Battersea Dogs and Cats Home's (UK) observational and longitudinal dog behaviour  
152 assessment records. The data were from a sample of dogs (N=4,990) at the shelter's  
153 three rehoming centres during 2014 (including dogs that arrived during 2013 or left in  
154 2015). We selected the records from all dogs that were at least 4 months old, excluding  
155 younger dogs because they were more likely to be unvaccinated, more limited in their  
156 interactions at the shelter and may have been kennelled in different areas to older dogs.  
157 Relevant demographic characteristics of the dogs are provided in Table 1. Although dogs  
158 were from a variety of heritages (including purebreeds and mongrels), the analyses here  
159 did not explore breed differences because visual assessment to attribute breed to dogs  
160 with unknown heritage has been questioned [52].

161

162

**Table 1. Demographic characteristics of the studied dogs.**

| <b>Variable</b>                                              | <b>Mean <math>\pm</math> SD / N</b> |
|--------------------------------------------------------------|-------------------------------------|
| Average age at shelter (years; all $\geq$ 4 months of age)   | 3.75 $\pm$ 3.03                     |
| Total days at the shelter                                    | 25.13 $\pm$ 41.53                   |
| Weight (average weight if multiple measurements; kg)         | 19.06 $\pm$ 10.26                   |
| Rehoming centre: London / Old Windsor / Brands Hatch         | 2897 / 1280 / 566                   |
| Males / females                                              | 2749 / 1994                         |
| Neutered before arrival / neutered at shelter / not neutered | 1218 / 1665 / 1502                  |
| Relinquished by owners / returned to shelter / strays        | 2892 / 260 / 1591                   |

163

## 164 **Shelter environment**

165 The shelter was composed of three different UK rehoming centres: a high-throughput,  
166 urban centre based at Battersea, London with capacity for approximately 150-200 dogs;  
167 a semi-rural/rural centre based at Old Windsor with capacity for approximately 100-150  
168 dogs; and a rural centre based at Brands Hatch with capacity for approximately 50 dogs.  
169 All dogs arrived in an intake area of their respective rehoming centre and, when  
170 considered suitable for adoption, were moved to a 'rehoming' area that was partially  
171 open to the public between 1000 h and 1600 h. All kennels were indoors. Kennels varied  
172 in size, but were usually approximately 4m x 2m and included either a shelf and bedding  
173 alcove area, or a more secluded bedding area at the back of the kennel (see [53] for  
174 more details). At different times throughout the day, dogs had access to indoor runs  
175 behind their kennels. In each kennel block area, dogs were cared for (e.g. fed, exercised,

176 kennel cleaned) by a relatively stable group of staff members, allowing the development  
177 of familiarity with staff members and offering some predictability for dogs after arrival  
178 at the shelter. Although data on the number of dogs in each kennel were incomplete, in  
179 the majority of cases dogs were kennelled singly for safety reasons. The shelter mainly  
180 operated between 0800 h and 1700 h each day. All dogs were socialised with staff  
181 and/or volunteers each day (often multiple times) unless it was unsafe to do so. They  
182 were provided water ad libitum and fed commercial complete dry and/or wet tinned  
183 food twice daily (depending on recommendations by veterinary staff). Dogs received  
184 daily tactile, olfactory and/or auditory enrichment/variety (e.g. toys, essential oils,  
185 classical music, time in a quiet 'chill-out' room).

186

## 187 **Data collection**

188 In the observational assessment procedure, trained shelter employees recorded  
189 observations of dog behaviour in a variety of contexts as part of normal shelter  
190 procedures. The average number of days between successive observations within all  
191 contexts and across all dogs was 3.27 (SD = 2.08), and dogs had an average of 9.77 (SD =  
192 13.41) observations within each context. Behavioural observations pertaining to each  
193 context were completed using an ethogram specific to that context and recorded in a  
194 custom computer system. Multiple observations could be completed each day. The  
195 ethogram behaviour that best described a dog's behaviour in a particular context during  
196 an observation was recorded by selecting it from a series of drop-down boxes (one for

197 each context). Although staff could also add additional information in character fields,  
198 we did not analyse those comments in this study. The ethogram for each context  
199 represented a scale of behaviours ranging from desirable to undesirable considered by  
200 the shelter to be relevant to dog welfare and ease of adoption. Contexts had between  
201 10 and 16 possible behaviours to choose from, some of which overlapped between  
202 different contexts. Among the least desirable behaviours in each context was aggression  
203 towards either people or dogs (depending on context). Aggression was formally defined  
204 as “*Growls, snarls, shows teeth and/or snaps when seeing/meeting other people/dogs,*  
205 *potentially pulling or lunging towards them*”, distinguished from non-aggressive but  
206 reactive responses, defined as “*Barks, whines, howls and/or play growls when*  
207 *seeing/meeting other people/dogs, potentially pulling or lunging towards them*”.  
208 Observation contexts included both onsite (at the shelter) and offsite (e.g. out in public  
209 parks) settings.

210

211 For the analyses here, we focused on observations of aggression in nine core onsite  
212 contexts: i) *Handling*, ii) *In kennel*, iii) *Out of kennel*, iv) *Interactions with familiar people*,  
213 v) *Interactions with unfamiliar people*, vi) *Eating food*, vii) *Interactions with toys*, viii)  
214 *Interactions with female dogs*, ix) *Interactions with male dogs*. For the *In kennel* and *Out*  
215 *of kennel* contexts, recording of aggression towards both people and dogs was possible.  
216 Although multiple observations could be made, if both occurred at the same time,  
217 aggression towards people would be prioritised over aggression towards dogs in the  
218 recording process. Therefore, *In kennel* and *Out of kennel* were each divided to reflect

219 aggression shown towards people and dogs, respectively. This resulted in 11 final  
220 aggression contexts, defined in Table 2, which were used as manifest variables in  
221 structural equation models to investigate latent aggressiveness traits. Each observation  
222 of aggression was recorded in the category that best described the scenario.  
223 Nonetheless, certain contexts could occur closely in space and time. For example, the  
224 *Handling* context could directly succeed the *Interactions with familiar people* or  
225 *Interactions with unfamiliar people* contexts. The sequential occurrence of certain  
226 contexts was used to inform tests of local independence, explained below.

227

228 We aggregated behavioural observations across time for each dog into a dichotomous  
229 variable indicating whether a dog had or had not shown aggression in a particular  
230 context at any time while at the shelter. This was performed because the overall  
231 prevalence of aggression was low, with only 1.06% of all observations involving  
232 aggression towards people and 1.13% towards dogs. Thus, the main difference between  
233 individuals was whether they had or had not shown aggression in a particular context  
234 during their time at the shelter (see Table S1 for raw counts of aggression by context),  
235 and we interpret aggressiveness here as a between-individual difference variable.

**Table 2. Behavioural observation contexts.**

| <b>Context</b>                      | <b>Definition</b>                                                                                                                                                                                                                                                       |
|-------------------------------------|-------------------------------------------------------------------------------------------------------------------------------------------------------------------------------------------------------------------------------------------------------------------------|
| Handling                            | A dog's reaction to informal handling by people (e.g. stroking non-sensitive areas, touching the collar, fitting a harness or lead).                                                                                                                                    |
| In kennel towards people            | A dog's reaction to people approaching or walking past the kennel.                                                                                                                                                                                                      |
| In kennel towards dogs              | A dog's reaction to dogs in neighbouring kennels or dogs walking past the kennel.                                                                                                                                                                                       |
| Interactions with familiar people   | A dog's reaction when outside of the kennel to familiar people (interacted with at least once before) approaching, making eye contact, speaking to or attempting to make physical contact with the dog.                                                                 |
| Interactions with unfamiliar people | A dog's reaction when outside of the kennel to unfamiliar people (never interacted with before) approaching, making eye contact, speaking to or attempting to make physical contact with the dog.                                                                       |
| Out of kennel towards people        | A dog's reaction when around people outside of the kennel. Large distances may separate the focal dog and people, and no attempt is made to engage by the people with the focal dog.                                                                                    |
| Out of kennel towards dogs          | A dog's reaction when around dogs outside of the kennel. Large distances may separate the focal dog and other dogs, and the dogs are not encouraged to interact.                                                                                                        |
| Eating food                         | A dog's reaction when eating food (e.g. from a food bowl, or toy filled with food) to people approaching, in close proximity, or attempting to touch the food container.                                                                                                |
| Interactions with toys              | A dog's reaction when interacting with toys to people approaching within close proximity and/or attempting to touch the toy.                                                                                                                                            |
| Interactions with female dogs       | A dog's reaction during structured interactions with a female dog, including approaching each other, walking in parallel, and interacting off-lead. Both dogs are aware of each other's presence and are in close enough proximity to engage in a physical interaction. |
| Interactions with male dogs         | A dog's reaction during structured interactions with a male dog, including approaching each other, walking in parallel, and interacting off-lead. Both dogs are aware of each other's presence and are in close enough proximity to engage in a physical interaction.   |

Behavioural observation contexts analysed for the presence or absence of aggression.

## 236 **Validity of behaviour recordings**

237 Validity of the recording of behaviour was assessed separately from the main data  
238 collection as part of a wider project investigating the use of the observational  
239 assessment method. Ninety-three shelter employees trained in conducting behavioural  
240 observations each watched (in groups of 5 – 10 people) 14 videos, approximately 30  
241 seconds each, presenting exemplars of 2 different behaviours from seven contexts (to  
242 keep the sessions concise and maximise the number of participants). For each context,  
243 behaviours were chosen pseudo-randomly by numbering each behaviour and selecting  
244 two numbers using a random number generator. Experienced behaviourists working at  
245 the shelter filmed the videos demonstrating the behaviours. Videos were shown to  
246 participants once in a pseudo-random order. After each video, participants recorded on  
247 a paper answer sheet the behaviour they thought most accurately described the dog's  
248 behaviour based on the ethogram specific to the context depicted. Two of the videos  
249 illustrated aggression: one in a combined *Interactions with new and familiar people*  
250 context (combined because familiarity between specific people and dogs was not  
251 universally known) and one in the *In kennel towards dogs* context. The authors were  
252 blind to the selection of videos shown and to the video coding sessions with shelter  
253 employees.

254

## 255 **Data analysis**

256 All data analysis was conducted in R version 3.3.2 [54].

257

## 258 **Validity of behaviour recordings**

259 The validity of shelter employees' recording of behaviour from videos was assessed by  
260 the percentage of participants who identified the 2 videos as showing examples of  
261 aggression.

262

## 263 **Missing data**

264 Data were missing when dogs did not experience particular contexts while at the  
265 shelter. The missing data rate was between 0.06% and 5% for each context, except for  
266 the *Interactions with female dogs* and *Interactions with male dogs* categories which had  
267 17% and 18% of missing values, respectively (because structured interactions with other  
268 dogs did not arise as frequently). Moreover, 16% and 7% of dogs were missing weight  
269 measurement and neuter status data, respectively, which were independent variables  
270 statistically controlled for in subsequent analyses. We created 5 multiply imputed data  
271 sets (using the *Amelia* package; [55]), upon which all of the analyses in the sections  
272 below were conducted and results pooled. The multiple imputation took into account  
273 the hierarchical structure of the data (observations within dogs), all independent  
274 variables reported below, and the data types (ordered binary variables for the context  
275 data, positive-continuous for weight measurements, nominal for neuter status). The



276 data were assumed to be missing at random, that is, dependent only on other variables  
277 in the analyses.

278

## 279 **Structural equation models**

280 We used structural equation modelling to assess whether aggression towards people  
281 (contexts: *Handling, In kennel towards people, Out of kennel towards people,*  
282 *Interactions with familiar people, Interactions with unfamiliar people, Eating food,*  
283 *Interactions with toys*) and towards dogs (contexts: *In kennel towards dogs, Out of*  
284 *kennel towards dogs, Interactions with female dogs, Interactions with male dogs*) could  
285 be explained by two latent aggressiveness traits: aggressiveness towards people and  
286 dogs, respectively. We compared a model where the latent variables were orthogonal to  
287 a model where the latent variables were allowed to correlate, since positive correlations  
288 between different aggressiveness traits in dogs have been reported in dogs [56]. Models  
289 were fit using the *lavaan* package [57], with the weighted least squares mean and  
290 variance adjusted (WLSMV) estimator and theta/conditional parameterisation, as  
291 recommended for categorical dependent variables [7,58,59]. The latent variables were  
292 standardised to have mean 0 and variance 1. The results were combined across imputed  
293 data sets using the 'runMI' function in the *semTools* package [60]. The fit of each model  
294 was ascertained using the comparative fit index (CFI) and Tucker Lewis index (TLI),  
295 where values > 0.95 indicate excellent fit, as well as the root mean squared error of

296 approximation (RMSEA) where values < 0.06 indicate good fit [7]. Parameter estimates  
297 were summarised by  $p$  values (considered significant at  $p < 0.05$ ).

298

## 299 **Local independence**

300 We tested the assumption of local independence by re-fitting the best-fitting structural  
301 equation model with residual correlations between context variables. To maintain a  
302 theoretically driven approach (see [61] regarding the best practice of including residual  
303 correlations in structural equation models) and model identifiability, we only tested a  
304 predefined set of residual correlations that we believed to be most relevant. First, we  
305 allowed correlations between *Handling with In kennel towards people*, *Interactions with*  
306 *familiar people*, *Interactions with unfamiliar people* and *Interactions with toys*,  
307 respectively. The *Handling* context could directly succeed these other contexts, leading  
308 to close temporal-spatial relationships, and whether a dog showed aggression in the  
309 *Handling* context may be mediated by a person's decision to handle a dog depending on  
310 the dog's behaviour in preceding contexts. The residual correlation between *Handling*  
311 and *Eating food* was not estimated because shelter employees would be unlikely to  
312 handle a dog while the dog ate its daily meals. The residual correlation between  
313 *Handling* and *Out of kennel towards people* was not estimated because any association  
314 between *Handling* and *Out of kennel towards people* would be mediated by either the  
315 *Interactions with familiar people* or *Interactions with unfamiliar people* context.  
316 Therefore, secondly, we estimated the three-way correlations between *Out of kennel*

317 *towards people, Interactions with familiar people and Interactions with unfamiliar*  
318 *people. Similarly, and lastly, we estimated the three-way correlations between Out of*  
319 *kennel towards dogs, Interactions with female dogs and Interactions with male dogs.*

320

## 321 **Measurement invariance**

322 To test for measurement invariance in each of the latent traits derived from the best  
323 fitting structural equation model, we investigated the response patterns across  
324 aggression contexts related to the same latent aggressiveness trait using Bayesian  
325 hierarchical logistic regression models. Whilst measurement invariance for categorical  
326 data can be ascertained in structural equation model frameworks [58,62], item response  
327 theory is more commonly applied to dichotomously scored variables. In psychometrics,  
328 the 1-parameter item response theory model, or Rasch model, represents the  
329 probability that an individual responds correctly to a particular test item as a logistic  
330 function of i) each individual's latent ability and ii) the item's difficulty level. The Rasch  
331 model can be expressed as a hierarchical logistic regression model [63,64], whereby  
332 individual latent abilities are modelled as individual-specific intercepts (i.e. 'random  
333 intercepts'), the propensity for a correct answer to an item  $i$  is its regression coefficient  
334  $\beta_i$ , and credible interactions between items and relevant independent variables (e.g.  
335 group status) indicate a violation of measurement invariance. Here, the dependent  
336 variable was the binary score for whether or not dogs had shown aggression in each  
337 context and the average probability of aggression across contexts varied by dog,

338 representing latent levels of aggressiveness. Context type, dog age, dog sex and their  
339 interactions were included as categorical independent variables.

340

341 Age was treated as a categorical variable, with categories reflecting general  
342 developmental periods: i) 4 months to 10 months (juvenile dogs before puberty), ii) 10  
343 months to 3 years (dogs maturing from juveniles to adults), iii) 3 years to 6 years  
344 (adults), and iv) 6 years + (older dogs). Broad age categories were chosen due to  
345 potentially large differences in developmental timing between individuals. Age was  
346 categorised because we predicted that aggression would be dependent on these  
347 developmental periods.

348

349 Models included additional demographic variables (see Table 1) that may mediate the  
350 probability of aggression: body weight (average weight if multiple measurements were  
351 taken), total number of days spent at the shelter, the rehoming centre at which dogs  
352 were based (London, Old Windsor, Brands Hatch), neuter status (neutered before  
353 arrival, neutered at the shelter, not neutered) and source type (relinquished by owner,  
354 returned to the shelter after adoption, stray). Categorical variables were represented as  
355 sum-to-zero deflections from the group-level intercept to ensure the intercept  
356 represented the average probability of aggression across categorical levels. Weight and  
357 total days at the shelter were mean-centered and standardised by 2 standard  
358 deviations. Due to the potentially complex relationships between these variables and

359 aggression (e.g. interactive effects between neuter status and sex; [49]), which could  
360 also include violations of measurement invariance, we decided not to interpret their  
361 effects inferentially. Instead, they were included to make the assessment of  
362 measurement invariance between sexes and age groups conditional on variance  
363 explained by potentially important factors.

364

365 For comparability to other studies in animal personality, behavioural repeatability was  
366 calculated across contexts in each model using the intraclass correlation coefficient  
367 (ICC), calculated as  $\frac{\sigma_{\beta}^2}{\sigma_{\beta}^2 + \sigma_{\epsilon}^2}$ , where  $\sigma_{\beta}^2$  represented the between-individual variance of the  
368 probability of aggression (i.e. the variance of the random intercepts), and  $\sigma_{\epsilon}^2$  was  $\pi^2/3$ ,  
369 the residual variance of the standard logistic distribution [65].

370

### 371 **Computation**

372 Models were computed using the probabilistic programming language Stan version 2.12  
373 [66], using Hamiltonian Monte Carlo, a type of Markov Chain Monte Carlo (MCMC)  
374 algorithm, to sample from the posterior distribution (model code supplied in Supporting  
375 Information). Prior distributions for all independent variables were normal distributions  
376 with mean 0 and standard deviation 1, attenuating regression coefficients towards zero  
377 for conservative inference. The prior on the overall intercept parameter was normally  
378 distributed with mean 0 and standard deviation 5. The standard deviation of dog-

379 specific intercept parameters was given a half-Cauchy prior distribution with mean 0  
380 and shape 2. Each model was run with 4 chains of 2,000 iterations with a 1,000 step  
381 warm-up period. The Gelman-Rubin statistic (ideally < 1.05) and visual assessment of  
382 traceplots were used to assess MCMC convergence and we checked the accuracy of the  
383 posterior predicted probabilities of aggression against the raw data. Regression  
384 coefficients were expressed as odds ratios and were summarised by their mean and 95%  
385 Bayesian credibility interval (CI, i.e. the 95% most probable parameter values). To  
386 compare levels of categorical variables and their interactions, we computed the 95% CI  
387 of the differences between the respective posterior distributions.

388

### 389 ***Model selection & parameter inference***

390 Models were run on each imputed data set and their respective posterior distributions  
391 were averaged to attain a single posterior distribution for inference. Adopting a  
392 Bayesian approach allowed the estimation of interaction parameters (i.e. testing  
393 measurement invariance) without requiring corrections for multiple comparisons as in  
394 frequentist null hypothesis testing [67]. Nonetheless, models included a large number of  
395 estimated parameters. Two strategies were employed to guard against over-fitting of  
396 models to data. First, we selected the model with the best out-of-sample predictive  
397 accuracy given the number of parameters based on the Widely Applicable Information  
398 Criterion (WAIC; using the R package *loo* [68]). Four variants of each model were  
399 computed: two-way interactions between contexts and age and contexts and sex,

400 respectively (model 1), a single interaction with sex but not with age (model 2), a single  
401 interaction with age but not with sex (model 3), and no interactions (model 4). All  
402 models included the mediating independent variables above. Second, to avoid testing  
403 point-estimate null hypotheses, the effect of a parameter was only considered credibly  
404 different from zero if the odds ratio exceeded the region of practical equivalence (ROPE;  
405 see [69]) around an odds ratio of 1 from 0.80 to 1.25. An odds ratio of 0.80 or 1.25  
406 indicates a 20% decrease or increase (i.e. 4/5 or 5/4 odds), respectively, in the odds of  
407 an outcome, frequently used in areas of bioequivalence testing (e.g. [70]), which we  
408 here considered to be small enough to demonstrate a negligible effect in the absence of  
409 additional information. If a 95% CI fell completely within the ROPE, the null hypothesis  
410 of no credible influence of that parameter was accepted; if a 95% CI spanned the ROPE  
411 (i.e. included part of the ROPE), then the parameter's influence was left undecided [69].

412

### 413 **Ethics statement**

414 Permission to access and utilise the data was given by the shelter after signing a non-  
415 disclosure agreement. Approval from an ethical review board was not required for this  
416 study.

417

## 418 **Data accessibility**

419 The data used in this study are protected by a non-disclosure agreement. Researchers  
420 can access the data by contacting Battersea Dogs and Cats Home.

421

## 422 **Results**

### 423 **Validity of behaviour recordings**

424 For the video showing aggression towards people, 51.61% of participants identified the  
425 behaviour as aggression and 41.94% identified the behaviour as non-aggressive but  
426 reactive behaviour (see definitions above). For the video showing aggression towards  
427 dogs, 52.69% identified the behaviour correctly and 44.09% identified the behaviour as  
428 non-aggressive but reactive behaviour. For the 12 other videos not showing aggression,  
429 only 1 person coded a video as aggression towards people and 3 people coded videos as  
430 aggression towards dogs.

431

### 432 **Structural equation models**

433 The raw tetrachoric correlation matrix for aggression between contexts is presented in  
434 Table S2. Both structural equation models demonstrated excellent fit, with the model



435 with correlated latent variables fitting marginally better (CFI: 0.97; TLI: 0.96; RMSEA:  
436 0.03) than the model with uncorrelated variables (CFI: 0.96; TLI: 0.95; RMSEA 0.04). All  
437 regression coefficients of the model with correlated latent variables were positive and  
438 significant (Table 3), and latent variables shared a significant positive correlation ( $\rho =$   
439 0.25;  $p < 0.001$ ; Table 3).

440

### 441 **Local independence**

442 Allowing the pre-defined residuals to co-vary in the structural equation model resulted  
443 in marginally better fit (CFI = 0.98; TLI = 0.97; RMSEA: 0.03). A significant negative  
444 correlation was observed between *Handling* and *In kennel towards people* contexts ( $\rho =$   
445  $-0.67$ ;  $p = 0.003$ ; Table 4), and *Handling* and *Interactions with unfamiliar people* contexts  
446 ( $\rho = -0.55$ ;  $p = 0.01$ ; Table 4). Significant positive correlations were observed between  
447 *Handling* and *Interactions with toys* contexts ( $\rho = 0.15$ ;  $p = 0.04$ ; Table 4), and *Out of*  
448 *kennel towards people* with the *Interactions with unfamiliar people* context ( $\rho = 0.27$ ;  $p =$   
449  $< 0.001$ ; Table 4). No significant residual correlations between contexts reflecting  
450 aggressiveness towards dogs were observed (Table 4).

451

452

**Table 3. Structural equation model parameter estimates.**

| Parameter                                        | Estimate | SE   | z value | p value |
|--------------------------------------------------|----------|------|---------|---------|
| Handling <sup>a</sup>                            | 0.83     | 0.06 | 15.07   | < 0.001 |
| In kennel towards people <sup>a</sup>            | 1.31     | 0.09 | 15.00   | < 0.001 |
| Out of kennel towards people <sup>a</sup>        | 0.33     | 0.07 | 12.60   | < 0.001 |
| Interactions with familiar people <sup>a</sup>   | 0.99     | 0.07 | 14.81   | < 0.001 |
| Interactions with unfamiliar people <sup>a</sup> | 1.58     | 0.12 | 12.97   | < 0.001 |
| Eating food <sup>a</sup>                         | 0.73     | 0.06 | 13.02   | < 0.001 |
| Interactions with toys <sup>a</sup>              | 0.54     | 0.07 | 8.04    | < 0.001 |
| In kennel towards dogs <sup>b</sup>              | 0.75     | 0.06 | 11.74   | < 0.001 |
| Out of kennel towards dogs <sup>b</sup>          | 0.50     | 0.04 | 11.87   | < 0.001 |
| Interactions with female dogs <sup>b</sup>       | 0.94     | 0.07 | 11.19   | < 0.001 |
| Interactions with male dogs <sup>b</sup>         | 0.89     | 0.07 | 12.66   | < 0.001 |
| Correlation: People ~ Dogs                       | 0.25     | 0.03 | 7.50    | < 0.001 |

Parameter estimates from the best-fitting structural equation model, explaining aggression by two correlated latent variables.

<sup>a</sup> Contexts reflecting aggressiveness towards people

<sup>b</sup> Contexts reflecting aggressiveness towards dogs

453

454

**Table 4. Tests of local independence.**

| <b>Residual correlations</b>                                                         | <b>Estimate</b> | <b>SE</b> | <b>z value</b> | <b>p value</b> |
|--------------------------------------------------------------------------------------|-----------------|-----------|----------------|----------------|
| Handling ~ In kennel towards people <sup>a</sup>                                     | -0.67           | 0.22      | -3.01          | 0.003          |
| Handling ~ Interactions with familiar people <sup>a</sup>                            | 0.15            | 0.09      | 1.72           | 0.09           |
| Handling ~ Interactions with unfamiliar people <sup>a</sup>                          | -0.55           | 0.21      | -2.66          | 0.01           |
| Handling ~ Interactions with toys <sup>a</sup>                                       | 0.15            | 0.07      | 2.06           | 0.04           |
| Out of kennel towards people ~ Interactions with familiar people <sup>a</sup>        | 0.04            | 0.08      | 0.51           | 0.61           |
| Out of kennel towards people ~ Interactions with unfamiliar people <sup>a</sup>      | 0.27            | 0.09      | 3.20           | 0.001          |
| Interactions with familiar people ~ Interactions with unfamiliar people <sup>a</sup> | 0.003           | 0.11      | 0.02           | 0.98           |
| Out of kennel towards dogs ~ Interactions with female dogs <sup>b</sup>              | -0.65           | 0.63      | -1.04          | 0.30           |
| Out of kennel towards dogs ~ Interactions with male dogs <sup>b</sup>                | -0.41           | 0.67      | -1.08          | 0.27           |
| Interactions with female dogs ~ Interactions with male dogs <sup>b</sup>             | -0.28           | 0.57      | -0.50          | 0.62           |

Estimated residual correlations between *a priori* defined structural equation model parameters.

<sup>a</sup> Contexts reflecting aggressiveness towards people

<sup>b</sup> Contexts reflecting aggressiveness towards dogs

455

## 456 **Measurement invariance**

457 Separate models were run for contexts reflecting aggressiveness towards people and

458 aggressiveness towards dogs. For all models, all Gelman-Rubin statistics were all < 1.01,

459 effective sample sizes for all parameters were > 1000, and traceplots showed good  
460 mixing. Posterior predictive checks of model estimates reflected the raw data (Figs 1  
461 and 2). The full measurement invariance model (model 1) including interactions  
462 between contexts and sex and contexts and age groups had the best out-of-sample  
463 predictive accuracy for both the aggressiveness towards people and aggressiveness  
464 towards dog models, respectively, illustrated by the lowest WAIC values (Table 5). Since  
465 some models included numerous interactions, we provide an overall summary of the  
466 main results below (Figs 1 and 2) with full parameter estimates provided in Tables S3  
467 and S4.

**Table 5. Bayesian hierarchical model selection using WAIC.**

| <b>Model</b> | <b>Aggressiveness towards people</b> | <b>Aggressiveness towards dogs</b> |
|--------------|--------------------------------------|------------------------------------|
| Model 1      | 13405.6 ± 179.0                      | 15257.2 ± 133.1                    |
| Model 2      | 13506.3 ± 179.6                      | 15381.4 ± 133.4                    |
| Model 3      | 13426.3 ± 179.1                      | 15285.3 ± 133.0                    |
| Model 4      | 13521.7 ± 179.5                      | 15407.6 ± 133.4                    |

Mean ± standard error of the Widely Applicable Information Criteria (WAIC) values per model and latent variable (aggressiveness towards people and dogs, respectively), used to assess measurement invariance: model 1 (age x context and sex x context interactions), model 2 (sex x context interaction only), model 3 (age x context interaction only), model 4 (no interactions). Models with the lowest WAIC values are estimated to have the best out-of-sample predictive accuracy.

468

#### 469 **Aggressiveness towards people**

470 The odds of aggression towards people, across categorical predictors and for an average  
471 dog of mean weight and length of stay at the shelter, were 0.022 (CI: 0.021 to 0.024), a

472 probability of approximately 2%. On average, aggression was most likely in the *In kennel*  
473 *towards people* context (OR = 0.054; CI: 0.049 to 0.058) and least probable in the  
474 *Interactions with toys* context (OR = 0.008; CI: 0.007 to 0.009).

475

476 Aggression was less likely across contexts for females than males (OR = 0.719; CI: 0.668  
477 to 0.770), although there were also credible interactions between sex and contexts (Fig  
478 1a; Table S3). Whereas males and females had similar odds of aggression in the *Out of*  
479 *kennel towards people* context, smaller differences were observed between *Out of*  
480 *kennel towards people* and *Handling* (OR = 0.578; CI: 0.481 to 0.682), *Eating food* (OR =  
481 1.812; CI: 1.495 to 2.152) and *Interactions with familiar people* (OR = 1.798; CI: 1.488 to  
482 2.126) contexts in females compared to males. Aggression in the *Interactions with*  
483 *unfamiliar people* context was also similar between males and females, while larger  
484 differences were observed between *Interactions with unfamiliar people* and *Handling*  
485 (OR = 0.616; CI: 0.530 to 0.702), *Eating food* (OR = 0.594; CI: 0.506 to 0.686) and  
486 *Interactions with familiar people* (OR = 0.598; CI: 0.513 to 0.687) contexts in females  
487 compared to males.

488

489 Apart from lower odds of aggression in 4 to 10 month olds compared to 10 month to 3  
490 year old dogs (OR = 0.638; CI: 0.565 to 0.705), there was no simple influence of age  
491 group on aggressiveness. Between the 4 to 10 months old and 3 to 6 years old groups,  
492 differences between the odds of aggression across contexts varied due to an increase of

493 aggression in certain contexts but not others (Fig 1b; Table S4). Aggression in *In kennel*  
494 *towards people* and *Interactions with unfamiliar people* contexts particularly increased,  
495 leading to larger differences between, for example, *In kennel towards people* and *Eating*  
496 *food* (OR = 0.524; CI: 0.400 to 0.642) and *Eating food* and *Interactions with unfamiliar*  
497 *people* (OR = 1.721; CI: 1.403 to 2.059) contexts for 10 month to 3 year olds compared  
498 to 4 to 10 month olds, and between *In kennel towards people* and *Out of kennel towards*  
499 *people* (OR = 0.470; CI: 0.355 to 0.606) and *Out of kennel towards people* and  
500 *Interactions with unfamiliar people* (OR = 2.051; CI: 1.608 to 2.543) contexts in 3 to 6  
501 year olds compared to 4 to 10 month olds. In 3 to 6 year old compared to 10 month to 3  
502 year old dogs, aggression increased in the *Handling* and *Eating food* contexts but  
503 decreased in the *Out of kennel towards people* context, resulting in larger differences  
504 between, for instance, *Handling* and *Out of kennel towards people* (OR = 0.526; CI: 0.409  
505 to 0.631) and *Out of kennel towards people* and *Interactions with unfamiliar people* (OR  
506 = 2.349; CI: 1.891 to 2.925), and smaller differences between *Eating food* and  
507 *Interactions with familiar people* (OR = 0.576; CI: 0.468 to 0.687).

508

509 Dogs over 6 years old demonstrated qualitatively different response patterns across  
510 certain contexts than all other age groups. While aggression was most probable in *In*  
511 *kennel towards people* and *Interactions with unfamiliar people* contexts for dogs aged 4  
512 months through 6 years, dogs over 6 years old were most likely to show aggression in  
513 the *Handling* context, leading to interactions between, for example, *Handling* and *In*  
514 *kennel towards people*, and between *Handling* and *Interactions with unfamiliar people*

515 contexts compared to the other age groups (Fig 1b; Table S3). Aggression when *Eating*  
516 *food* and in *Interactions with toys* contexts also increased compared to that expressed  
517 by younger dogs, resulting in credible differences between, for instance, *Eating food* and  
518 *Interactions with familiar people* contexts between dogs aged 10 months to 3 years and  
519 over 6 years (OR = 0.379; CI: 0.300 to 0.465) and between *Out of kennel towards people*  
520 and *Interactions with toys* contexts between over 6 year olds and all other age groups  
521 (Table S3).

522

a

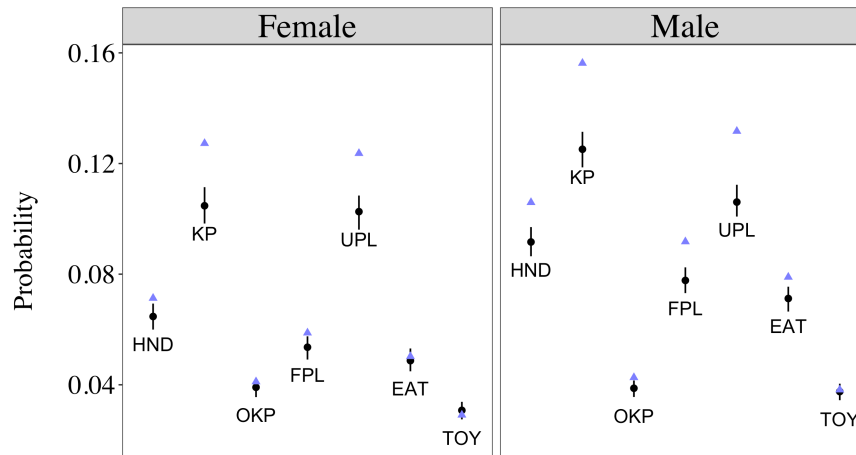

b

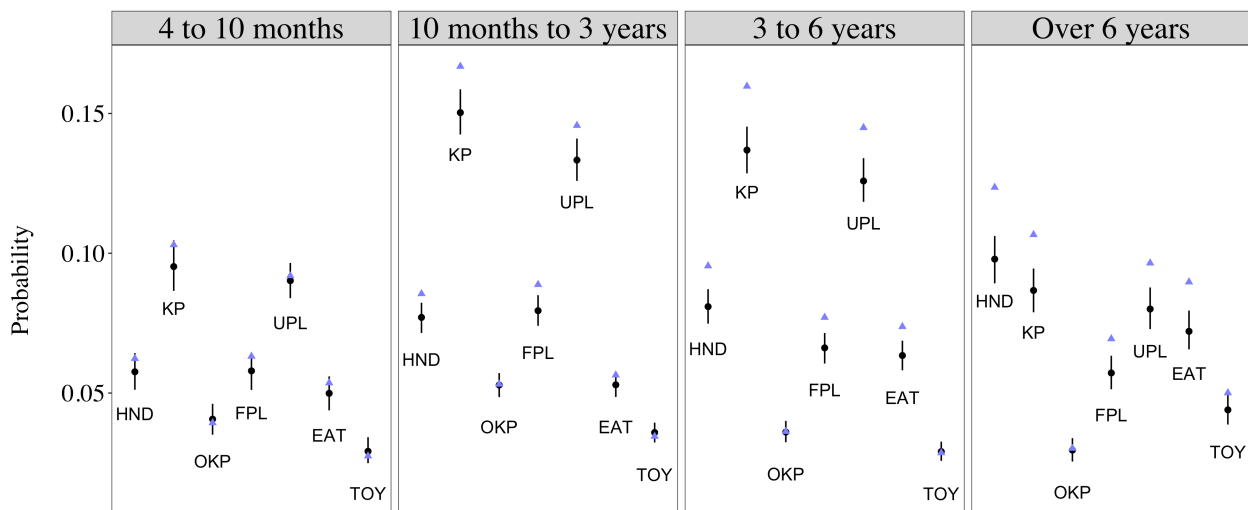

**Fig 1. Predicted probabilities of aggression towards people in different contexts by sex (panel a) and age groups (panel b).** Black points and vertical lines show mean and 95% credibility intervals of model parameter estimates; blue triangles show raw sample data. Abbreviations used in the figure: HND (*Handling*); KP (*In kennel towards people*); OKP (*Out of kennel towards people*); FPL (*Interactions with familiar people*); UPL (*Interactions with unfamiliar people*); EAT (*Eating food*); TOY (*Interactions with toys*).

523

524



## 525 **Aggressiveness towards dogs**

526 The odds of aggression towards dogs, across categorical predictors and for an average  
527 dog of mean weight and length of stay at the shelter, was 0.176 (CI: 0.168, 0.184),  
528 corresponding to a probability of approximately 15%. Dogs were most likely to show  
529 aggression in the *Interactions with male dogs* context (OR = 0.297; CI: 0.198 to 0.217)  
530 and least likely in the *In kennel towards dogs* context (OR = 0.099; CI: 0.094 to 0.104; Fig  
531 2; Table S4).

532

533 No credible mean-level differences existed between females and males (OR = 1.187; CI:  
534 1.128 to 1.250). However, the difference in aggression between the *Interactions with*  
535 *female dogs* and *Interactions with male dogs* contexts was smaller for females (OR =  
536 1.542; CI: 1.400 to 1.704; Fig 2a; Table S4), as were the differences between *Interactions*  
537 *with male dogs* and *In kennel towards dogs* (OR = 0.661; CI: 0.590 to 0.732) and *In*  
538 *kennel towards dogs* and *Out of kennel towards dogs* (OR = 1.420; CI: 1.269 to 1.587).  
539 Females were also more likely to show aggression in *Interactions with female dogs* than  
540 *Out of kennel towards dogs* compared to males (OR = 1.444; CI: 1.301 to 1.603).

541

542 Dogs aged 4 to 10 months old had credibly lower odds of aggression towards dogs than  
543 older dogs across contexts (Fig 2b; Table S4). However, contexts and age also showed  
544 interactive effects. In particular, aggression in *Interactions with female dogs* and

545 *Interactions with male dogs* contexts tended to increase relative to other contexts. For  
546 instance, the relationship between *Interactions with female dogs* and *Out of kennel*  
547 *towards dogs* contexts reversed in direction between 4 to 10 month and 10 month to 3  
548 year olds (OR = 0.595; CI: 0.495 to 0.688) as did the relationship between *Interactions*  
549 *with male dogs* and *Out of kennel towards dogs* contexts (OR = 0.499; CI: 0.422 to  
550 0.575). The relationship between *In kennel towards dogs* and *Out of kennel towards*  
551 *dogs* contexts also changed across age groups (Fig 2b; Table S4). Four to 10 months old  
552 were more likely to show aggression in *Out of kennel towards dogs* than *In kennel*  
553 *towards dogs* contexts, but the difference was smaller in 10 months to 3 year olds (OR =  
554 0.608; CI: 0.505 to 0.728) and in over 6 year olds (OR = 0.396; CI: 0.316 to 0.481). The  
555 latter relationship was reversed in 3 to 6 year olds compared to 4 to 10 month old dogs  
556 (OR = 0.277; CI: 0.227 to 0.331) and 10 month to 3 year old dogs (OR = 0.456; CI: 0.396  
557 to 0.516).

558

a

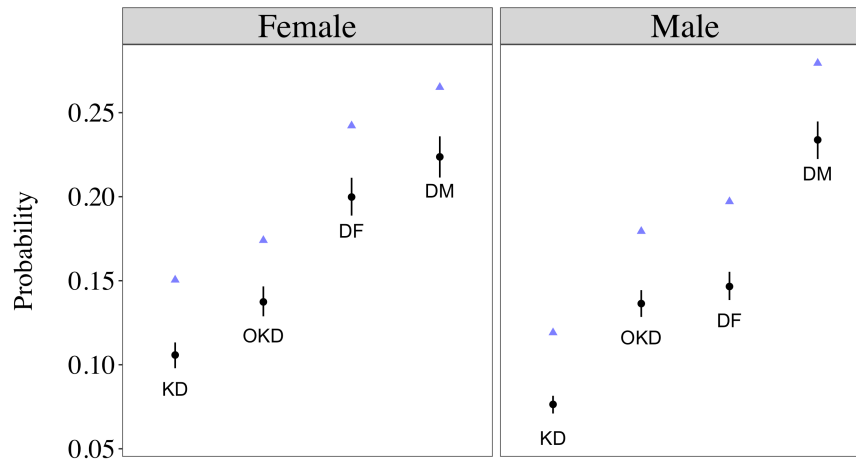

b

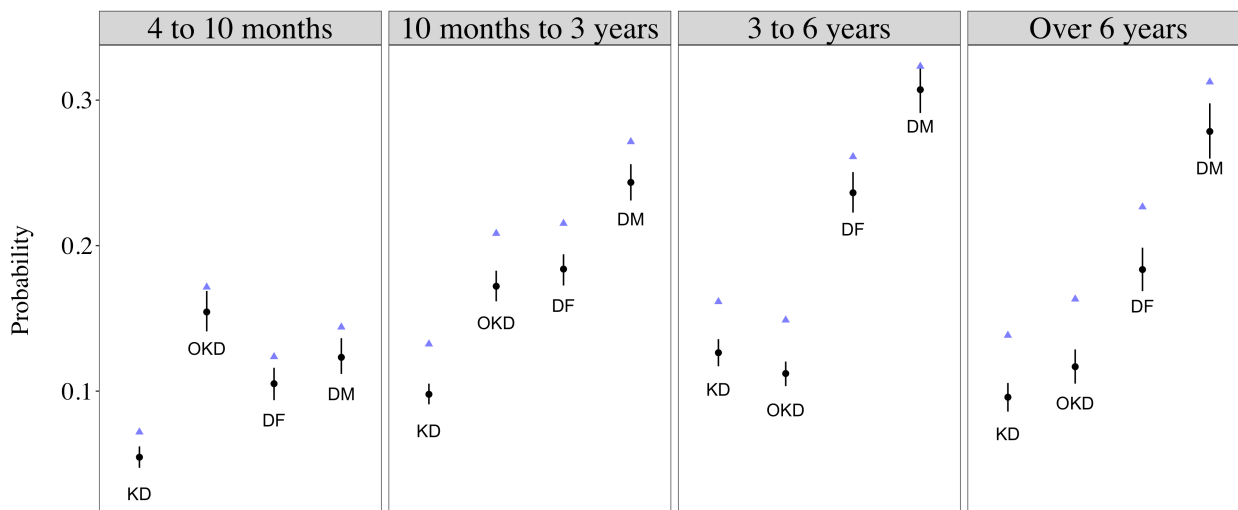

**Fig 2. Predicted probabilities of aggression towards dogs in different contexts by sex (panel a) and age groups (panel b).** Black points and vertical lines show mean and 95% credibility intervals of model parameter estimates; blue triangles show raw sample data. Abbreviations used in the figure: KD (*In kennel towards dogs*); OKD (*Out of kennel towards dogs*); DF (*Interactions with female dogs*); DM (*Interactions with male dogs*).

559

560

## 561 **Repeatability**

562 Both aggressiveness towards people and dog showed moderate repeatability across  
563 contexts ( $ICC_{people} = 0.479$ ; CI: 0.466, 0.491;  $ICC_{dogs} = 0.303$ ; CI: 0.291, 0.315),  
564 although aggressiveness towards people was more repeatable than aggressiveness  
565 towards dogs ( $ICC_{difference} = 0.176$ ; CI: 0.158, 0.192).

566

## 567 **Discussion**

568 In this study, we have examined whether local independence and measurement  
569 invariance hold for hypothesised latent aggressiveness traits in shelter dogs.  
570 Observational recordings of aggression directed towards people and dogs across  
571 different shelter contexts were explained by two positively correlated latent variables,  
572 and behaviour across contexts was moderately repeatable. These results are consistent  
573 with the definition of animal personality as behaviour that shows moderately consistent  
574 between-individual differences across time or contexts [4], and characterised by  
575 multiple observed behaviours being decomposed into lower-dimensional behavioural  
576 traits. Yet, subsequent investigations indicated violations of local independence and  
577 measurement invariance, questioning the validity of the latent variables as  
578 homogeneous personality traits. While a number of factors may contribute to the low  
579 predictive validity of certain dog personality assessments [48], ensuring the robustness  
580 of inferences made about personality traits is critical, especially considering the large

581 number of traits that have been proposed [34,35]. Given the popularity of latent  
582 variable models, such as exploratory and confirmatory factor analysis (e.g. [17,29,71]),  
583 to understand the organisation of personality in dogs, ascertaining local independence  
584 and measurement invariance of personality traits should be routine practice, as it has  
585 become in human (personality) psychology (e.g. [26,72–74]).

586

587 Local independence implies that the association between manifest variables is greater  
588 than that explained by the latent variable. Here, local independence was investigated  
589 between manifest variables that were believed to have close temporal-spatial  
590 relationships. While local independence was confirmed for contexts reflecting  
591 aggressiveness towards dogs, contexts reflecting aggressiveness towards people showed  
592 a violation of local independence. Aggression in the *Handling* context shared a negative  
593 residual correlation with both the *In kennel towards people* and *Interactions with*  
594 *unfamiliar people* contexts, while positive residual correlations were present between  
595 *Handling* and *Interactions with toys*, and *Out of kennel towards people* and *Interactions*  
596 *with unfamiliar people* contexts (Table S4). Violations of local independence may arise  
597 through shared method variance [75–78] or unmodelled latent variables influencing  
598 manifest variables [79,80]. For example, if a dog showed aggression when an unfamiliar  
599 person approached, it may be less likely to be handled by that person, inducing a  
600 negative residual correlation conditional on latent levels of aggression as was observed  
601 here between the *Handling* and *Interactions with unfamiliar people* contexts. Likewise,  
602 the *Handling* context and the *Interactions with toys* contexts are similar in that both

603 require dog and person to be close together, and interacting with toys and handling may  
604 co-occur at the same time, inducing a positive residual correlation between contexts.

605

606 While authors have argued that greater standardisation and validation of personality  
607 assessments is key to ensuring the accurate measurement of underlying traits [34,46], it  
608 may be untenable to avoid dependencies between testing contexts. Displays of  
609 aggression in one sub-test will likely change how people conduct future sub-tests with  
610 the same dog, regardless of test standardisation. Moreover, the hierarchical structure of  
611 animal personality, including the presence of behavioural syndromes, makes the  
612 isolated measurement of one trait unrealistic [75]. For instance, the positive residual  
613 correlation between *Out of kennel towards people* and *Interactions with unfamiliar*  
614 *people* may be mediated by additional traits of interest to personality researchers, such  
615 as fearfulness or anxiety [29,81], if dogs who are fearful of interacting with unfamiliar  
616 people are more likely to show aggression beyond that described by a latent  
617 aggressiveness trait. Some human psychologists have argued that violations of local  
618 independence are a natural consequence of the organisation of behaviour as a complex  
619 dynamic system [82,83], which unfolds with respect to time- and context-dependent  
620 constraints [84]. Thus, awareness of local independence and its violation could facilitate  
621 closer understanding of the dynamics driving personality test responses beyond  
622 explanations purely based on personality traits.

623

624 While different subsets of a population may differ in mean levels of trait expression,  
625 interactions between behavioural responses and those subsets indicate that the same  
626 phenomenon is not under measurement across groups [23,24]. Using a Bayesian  
627 hierarchical model analogous to the Rasch model, we found that the probability of  
628 aggression across contexts was still dependent on sex and age conditional on latent  
629 levels of aggressiveness towards people and dog (Figs 1 and 2; Tables S3 and S4),  
630 indicating the violation of measurement invariance. Female dogs, for example, were  
631 more likely than males to show aggression in *Out of kennel towards people* and  
632 *Interactions with unfamiliar people* contexts relative to other contexts (Fig 1a). Females  
633 also demonstrated similar odds of aggression during *Interactions with female dogs* and  
634 *Interactions with male dogs*, whereas males were more likely to show aggression  
635 towards male than female dogs (Fig 2a). Thus, latent levels of aggressiveness did not  
636 easily explain differences in aggression across contexts. As with local independence,  
637 different behavioural variables unaccounted for in this study may also result in  
638 violations of measurement invariance. For instance, while dogs up to 6 years old were  
639 most likely to show aggression in *In kennel towards people* and *Interactions with*  
640 *unfamiliar people* contexts, dogs over 6 years old demonstrated aggression most  
641 commonly in the *Handling* context, which may reflect an increase in pain-motivated  
642 aggression. Dogs over 6 years old also showed an increase in aggression in the *Eating*  
643 *food* and *Interactions with toys* contexts relative to other age groups, suggesting that  
644 older dogs in shelter populations may be less tolerant during close interactions with

645 people (i.e. handling, people in the vicinity of their food and toys) compared to other  
646 contexts.

647

648 Investigating factors that predict a dog's personality, or whether a dog's personality  
649 predicts other outcomes of interest (e.g. future behavioural scores; [39,40]), is also of  
650 substantive interest to researchers. Persson *et al.* [32] found interactive effects between  
651 sex and age on human-directed social behaviour traits. Moreover, Asp *et al.* [56] found  
652 that sex and age interacted with breed in explaining differences in C-BARQ trait scores.  
653 To ensure the robustness of their conclusions, however, researchers should ensure that  
654 the traits being investigated satisfy model assumptions, not only for statistical accuracy,  
655 but so that interpreting the difference between individuals as a function of trait scores is  
656 both feasible and meaningful.

657

658 Local independence and measurement invariance are assumptions of confirmatory,  
659 reflective latent variable models, but are not required assumptions for formative  
660 models, which posit that the latent variable is simply a linear composite of manifest  
661 variables, rather than a causal, underlying variable [20]. While formative models such as  
662 principal components analysis (e.g. [32,33,85]) may, as a result, appear attractive and  
663 continue to be used in dog personality studies, their use has been discouraged. Principal  
664 components analysis will always result in lower-dimensional variables comprised of  
665 linear combinations of manifest variables, even when those manifest variables are



666 uncorrelated random variables (e.g. see [12]). Consequently, finding principal  
667 components that underlie behavioural data is neither surprising nor evidence for the  
668 discovery of domain-general personality traits. Crucially, for personality traits to be of  
669 use in understanding the organisation of dog behaviour or be considered as predictors  
670 of future dog behaviour, they should, arguably, hold causal status. In human psychology,  
671 Schimmack [86] and Borsboom [6] note the importance of interpreting latent variables  
672 as causal variables for understanding unobserved constructs, such as personality traits.  
673 To this end, reflective models, especially confirmatory approaches such as structural  
674 equation modelling or item response theory, present a more powerful framework to  
675 distinguish signal from noise in multivariate behavioural data [20,86] and are concurrent  
676 with a theoretical interpretation of personality traits as causal variables underpinning  
677 animal behaviour [16]. Increasing the popularity of such approaches could be  
678 particularly helpful in evaluating the reproducibility of dog personality traits across  
679 existing studies.

680

681 Although we have identified violations of both local independence and measurement  
682 invariance, we remain cautious about hypothesising *a posteriori* about their causes. A  
683 problem for the wider perspective of animal personality research is that personality  
684 traits are typically defined operationally, based on the statistical repeatability of  
685 quantifiable behaviour [77,87,88]. As has been discussed in human personality  
686 psychology, operational definitions are ontologically ambiguous [89,90]. That is, while  
687 operational definitions facilitate experimentation in animal personality [4], they are

688 ambiguous with respect to the biological mechanisms underlying trait expression. For  
689 example, Budaev and Brown remark that boldness, defined as a propensity to take risks,  
690 could encompass a range of distinct personality traits, each with a different biological  
691 basis [75]. Whilst reflective latent variable models allow researchers to test hypotheses  
692 about the relatedness of measured behaviours via one or more underlying traits, they  
693 have also been criticised as ambiguous [81]. For example, it is uncertain what reflective  
694 latent variables may represent in biological organisation [89] or even whether they are  
695 features individuals possess or simply emergent features of between-individual  
696 differences [91,92]. Such considerations highlight the importance of research on the  
697 proximate mechanisms of personality [87] and longitudinal data analyses to separate  
698 between- from within-individual behavioural variation [93,94].

699

700 A number of authors have emphasised the poor predictive value of aggression tests in  
701 shelter dogs compared to tests of other traits [37,39,48]. The low occurrence of  
702 aggression can make its accurate measurement difficult [39], and some studies actively  
703 exclude dogs that have shown aggression in the shelter (e.g. [39]). The probability of  
704 observing aggression recorded in this study was low, especially in contexts reflecting  
705 aggressiveness towards people (Fig 1). Nonetheless, evaluation of the validity of the  
706 behavioural recordings indicated that shelter employees might mistake observations of  
707 aggression for non- aggressive responses (e.g. over-excitement and frustration when  
708 seeing people/dogs), meaning that the true probability of aggression was potentially  
709 under-estimated (although incorrectly coding other behaviours as aggression also

710 occurred, albeit rarely). Infrequent occurrence and/or recording of aggression may also  
711 limit accurate predictions of future behaviour. Patronek and Bradley [48] demonstrate  
712 using simulation that the low prevalence of aggression inflates the chance that  
713 aggression shown in a shelter assessment represents a false positive. In general, our  
714 results support this conclusion in the sense that aggression may be shown differentially  
715 across contexts not explained by latent levels of aggressiveness. Violations of local  
716 independence and measurement invariance as found here indicate, further, that it is not  
717 only the difference between false and true positives and negatives, but the validity of  
718 inferring homogeneous personality traits by which to compare individual dogs, that  
719 needs careful consideration. Consequently, we agree with recommendations to  
720 establish the efficacy of longitudinal, observational assessments rather than relying on a  
721 single assessment made using a traditional test battery [31,39,48]. This approach will  
722 prioritise the cumulative understanding of a dog's context-dependent behaviour and  
723 help to guide decisions about the potential risk a dog poses to humans and other  
724 animals.

725

## 726 **Conclusion**

727 This study has tested the assumptions of local independence and measurement  
728 invariance of personality traits in shelter dogs. Using structural equation modelling,  
729 aggression across behavioural contexts was explained by two, correlated latent  
730 variables and demonstrated repeatability. Nevertheless, significant residual correlations

731 remained between certain behavioural contexts related to aggressiveness towards  
732 people, violating the assumption of local independence. In addition, aggression in  
733 different contexts showed differential patterns of response across sex and age,  
734 indicating a lack of measurement invariance. Violations of local independence and  
735 measurement invariance imply that aggressiveness towards people and dogs may not  
736 be enough to explain patterns of aggression in different contexts, or that inferences  
737 based on these hypothesised personality traits may in fact be misleading. We encourage  
738 researchers to more closely assess the measurement assumptions underlying reflective  
739 latent variable models before making conclusions about the effects of, or factors  
740 influencing, personality.

741

## 742 **Acknowledgements**

743 The authors are grateful to Battersea Dogs and Cats Home for allowing us to access the  
744 data for this study.

745

## 746 **References**

- 747 1. Dochtermann NA, Jenkins SH. Behavioural syndromes in Merriam's kangaroo rats  
748 (*Dipodomys merriami*): a test of competing hypotheses. *Proc R Soc Biol Sci.* 2007;274:  
749 2343–2349. doi:10.1098/rspb.2007.0622

- 750 2. Dochtermann NA, Dingemanse NJ. Behavioral syndromes as evolutionary constraints.  
751 Behav Ecol. 2013; art002. doi:10.1093/beheco/art002
- 752 3. Westneat DF, Wright J, Dingemanse NJ. The biology hidden inside residual within-  
753 individual phenotypic variation. Biol Rev Camb Philos Soc. 2015;90: 729–743.  
754 doi:10.1111/brv.12131
- 755 4. Réale D, Reader SM, Sol D, McDougall PT, Dingemanse NJ. Integrating animal  
756 temperament within ecology and evolution. Biol Rev Camb Philos Soc. 2007;82: 291–  
757 318. doi:10.1111/j.1469-185X.2007.00010.x
- 758 5. Sih A, Bell AM, Johnson JC, Ziemba RE. Behavioral syndromes: an integrative  
759 overview. Q Rev Biol. 2004;79: 241–277. doi:10.1086/422893
- 760 6. Spearman C. “General intelligence,” objectively determined and measured. Am J  
761 Psychol. 1904;15: 201–292. doi:10.2307/1412107
- 762 7. Beaujean AA. Latent variable modeling using R: A step-by-step guide. New York:  
763 Routledge; 2014.
- 764 8. Bollen KA. Latent variables in psychology and the social sciences. Annu Rev Psychol.  
765 2002;53: 605–634. doi:10.1146/annurev.psych.53.100901.135239
- 766 9. Borsboom D. The attack of the psychometricians. Psychometrika. 2006;71: 425–440.  
767 doi:10.1007/s11336-006-1447-6

- 768 10. Budaev DS. How many dimensions are needed to describe temperament in animals:  
769 a factor reanalysis of two data sets. *Int J Comp Psychol*. <http://cogprints.org/5478/>;  
770 1998.
- 771 11. Bollen K, Lennox R. Conventional wisdom on measurement: a structural equation  
772 perspective. *Psychol Bull*. 1991;110: 305–314. doi:10.1037/0033-2909.110.2.305
- 773 12. Budaev SV. Using principal components and factor analysis in animal behaviour  
774 research: caveats and guidelines. *Ethology*. 2010;116: 472–480. doi:10.1111/j.1439-  
775 0310.2010.01758.x
- 776 13. Dingemanse NJ, Dochtermann N, Wright J. A method for exploring the structure of  
777 behavioural syndromes to allow formal comparison within and between data sets. *Anim*  
778 *Behav*. 2010;79: 439–450. doi:10.1016/j.anbehav.2009.11.024
- 779 14. Fabrigar LR, Wegener DT, MacCallum RC, Strahan EJ. Evaluating the use of  
780 exploratory factor analysis in psychological research. *Psychol Methods*. 1999;4: 272–  
781 299. doi:10.1037/1082-989X.4.3.272
- 782 15. Preacher KJ, MacCallum RC. Repairing Tom Swift’s electric factor analysis machine.  
783 *Understanding Statistics*. 2003;2: 13–43. doi:10.1207/S15328031US0201\_02
- 784 16. Araya-Ajoy YG, Dingemanse NJ. Characterizing behavioural “characters”: An  
785 evolutionary framework. *Proc R Soc B*. 2014;281: 20132645.  
786 doi:10.1098/rspb.2013.2645

- 787 17. Arden R, Adams MJ. A general intelligence factor in dogs. *Intelligence*. 2016;55: 79–  
788 85. doi:10.1016/j.intell.2016.01.008
- 789 18. van den Berg SM, Heuven HCM, van den Berg L, Duffy DL, Serpell JA. Evaluation of  
790 the C-BARQ as a measure of stranger-directed aggression in three common dog breeds.  
791 *Appl Anim Behav Sc*. 2010;124: 136–141. doi:10.1016/j.applanim.2010.02.005
- 792 19. Bartholomew DJ. Factor analysis for categorical data. *J R Stat Soc Series B Stat*  
793 *Methodol*. 1980;42: 293–321.
- 794 20. Markus KA, Borsboom D. *Frontiers of test validity theory: Measurement, causation,*  
795 *and meaning*. 1st ed. New York, N.Y: Routledge; 2013.
- 796 21. Drasgow F. Study of the measurement bias of two standardized psychological tests.  
797 *Journal of Applied Psychology*. 1987;72: 19–29. doi:10.1037/0021-9010.72.1.19
- 798 22. Mellenbergh GJ. Item bias and item response theory. *Int J Educ Res*. 1989;13: 127–  
799 143. doi:10.1016/0883-0355(89)90002-5
- 800 23. Meredith W. Measurement invariance, factor analysis and factorial invariance.  
801 *Psychometrika*. 1993;58: 525–543. doi:10.1007/BF02294825
- 802 24. Reise SP, Widaman KF, Pugh RH. Confirmatory factor analysis and item response  
803 theory: two approaches for exploring measurement invariance. *Psychol Bull*. 1993;114:  
804 552–566. doi:10.1037/0033-2909.114.3.552

- 805 25. Jansen BRJ, van der Maas HLJ. Statistical test of the rule assessment methodology by  
806 latent class analysis. *Dev Rev.* 1997;17: 321–357. doi:10.1006/drev.1997.0437
- 807 26. Wicherts JM, Dolan CV. Measurement invariance in confirmatory factor analysis: an  
808 illustration using IQ test performance of minorities. *Educ Meas Issues Pract.* 2010;29:  
809 39–47. doi:10.1111/j.1745-3992.2010.00182.x
- 810 27. Widaman KF, Reise SP. Exploring the measurement invariance of psychological  
811 instruments: applications in the substance use domain. In: Bryant KJ, Windle M, West  
812 SG, editors. *The science of prevention: Methodological advances from alcohol and*  
813 *substance abuse research.* Washington, DC, US: American Psychological Association;  
814 1997. pp. 281–324.
- 815 28. Goddard ME, Beilharz RG. Genetic and environmental factors affecting the suitability  
816 of dogs as Guide Dogs for the Blind. *Theor Appl Genet.* 1982;62: 97–102.  
817 doi:10.1007/BF00293339
- 818 29. Hsu Y, Serpell JA. Development and validation of a questionnaire for measuring  
819 behavior and temperament traits in pet dogs. *J Am Vet Med Assoc.* 2003;223: 1293–  
820 1300. doi:10.2460/javma.2003.223.1293
- 821 30. Scott JP, Fuller JL. *Genetics and the social behavior of the dog.* University of Chicago  
822 Press; 2012.



- 823 31. Rayment DJ, Groef BD, Peters RA, Marston LC. Applied personality assessment in  
824 domestic dogs: limitations and caveats. *Appl Anim Behav Sci.* 2015;163: 1–18.  
825 doi:10.1016/j.applanim.2014.11.020
- 826 32. Persson ME, Wright D, Roth LSV, Batakis P, Jensen P. Genomic regions associated  
827 with interspecies communication in dogs contain genes related to human social  
828 disorders. *Sci Rep.* 2016;6. doi:10.1038/srep33439
- 829 33. Sundman A-S, Johnsson M, Wright D, Jensen P. Similar recent selection criteria  
830 associated with different behavioural effects in two dog breeds. *Genes Brain Behav.*  
831 2016;15: 750–756. doi:10.1111/gbb.12317
- 832 34. Jones AC, Gosling SD. Temperament and personality in dogs (*Canis familiaris*): a  
833 review and evaluation of past research. *Appl Anim Behav Sci.* 2005;95: 1–53.  
834 doi:10.1016/j.applanim.2005.04.008
- 835 35. Fratkin JL, Sinn DL, Patall EA, Gosling SD. Personality consistency in dogs: a meta-  
836 analysis. *PLOS ONE.* 2013;8: e54907. doi:10.1371/journal.pone.0054907
- 837 36. Posluns JA, Anderson RE, Walsh CJ. Comparing two canine personality assessments:  
838 convergence of the MCPQ-R and DPQ and consensus between dog owners and dog  
839 walkers. *Appl Anim Behav Sci.* doi:10.1016/j.applanim.2016.12.013
- 840 37. Bennett SL, Litster A, Weng H-Y, Walker SL, Luescher AU. Investigating behavior  
841 assessment instruments to predict aggression in dogs. *Appl Anim Behav Sci.* 2012;141:  
842 139–148. doi:10.1016/j.applanim.2012.08.005

- 843 38. Mohan-Gibbons H, Weiss E, Slater M. Preliminary investigation of food guarding  
844 behavior in shelter dogs in the United States. *Animals*. 2012;2: 331–346.  
845 doi:10.3390/ani2030331
- 846 39. Mornement KM, Coleman GJ, Toukhsati SR, Bennett PC. Evaluation of the predictive  
847 validity of the Behavioural Assessment for Re-homing K9's (B.A.R.K.) protocol and owner  
848 satisfaction with adopted dogs. *Appl Anim Behav Sci*. 2015;167: 35–42.  
849 doi:10.1016/j.applanim.2015.03.013
- 850 40. Riemer S, Müller C, Virányi Z, Huber L, Range F. The predictive value of early  
851 behavioural assessments in pet dogs: a longitudinal study from neonates to adults. *PLOS*  
852 *ONE*. 2014;9: e101237. doi:10.1371/journal.pone.0101237
- 853 41. Wilsson E, Sundgren P-E. Behaviour test for eight-week old puppies: heritabilities of  
854 tested behaviour traits and its correspondence to later behaviour. *Appl Anim Behav Sci*.  
855 1998;58: 151–162. doi:10.1016/S0168-1591(97)00093-2
- 856 42. Goodloe LP, Borchelt PL. Companion dog temperament traits. *J Appl Anim Welf Sci*.  
857 1998;1: 303–338. doi:10.1207/s15327604jaws0104\_1
- 858 43. Jones AC. Development and validation of a dog personality questionnaire. Doctoral  
859 Thesis. University of Texas at Austin. 2008. Available from:  
860 [http://gosling.psy.utexas.edu/wp-content/uploads/2014/10/Amanda-Claire-Jones-Diss-](http://gosling.psy.utexas.edu/wp-content/uploads/2014/10/Amanda-Claire-Jones-Diss-2008.pdf)  
861 [2008.pdf](http://gosling.psy.utexas.edu/wp-content/uploads/2014/10/Amanda-Claire-Jones-Diss-2008.pdf)

- 862 44. Orritt R. Dog bites: a complex public health issue. *Vet Rec.* 2015;176: 640–641.  
863 doi:10.1136/vr.h3215
- 864 45. Svartberg K. Shyness-boldness predicts performance in working dogs. *Appl Anim*  
865 *Behav Sci.* 2002;79: 157–174. doi:10.1016/S0168-1591(02)00120-X
- 866 46. Taylor KD, Mills DS. The development and assessment of temperament tests for  
867 adult companion dogs. *J Vet Behav.* 2006;1: 94–108. doi:10.1016/j.jveb.2006.09.002
- 868 47. Henning G. Meanings and implications of the principle of local independence. *Lang*  
869 *Res.* 1989;6: 95–108. doi:10.1177/026553228900600108
- 870 48. Patronek GJ, Bradley J. No better than flipping a coin: reconsidering canine behavior  
871 evaluations in animal shelters. *J Vet Behav.* 2016;15: 66–77.  
872 doi:10.1016/j.jveb.2016.08.001
- 873 49. Casey RA, Loftus B, Bolster C, Richards GJ, Blackwell EJ. Human directed aggression  
874 in domestic dogs (*Canis familiaris*): occurrence in different contexts and risk factors.  
875 *Appl Anim Behav Sci.* 2014;152: 52–63. doi:10.1016/j.applanim.2013.12.003
- 876 50. Hsu Y, Sun L. Factors associated with aggressive responses in pet dogs. *Appl Anim*  
877 *Behav Sci.* 2010;123: 108–123. doi:10.1016/j.applanim.2010.01.013
- 878 51. Sherman CK, Reisner IR, Taliaferro LA, Houpt KA. Characteristics, treatment, and  
879 outcome of 99 cases of aggression between dogs. *Appl Anim Behav Sci.* 1996;47: 91–  
880 108. doi:10.1016/0168-1591(95)01013-0

- 881 52. Voith VL, Trevejo R, Dowling-Guyer S, Chadik C, Marder A, Johnson V, et al.  
882 Comparison of visual and DNA breed identification of dogs and inter-observer reliability.  
883 *Sociology*. 2013;3: 17–29.
- 884 53. Owczarczak-Garstecka, SC, Burman OHP. Can sleep and resting behaviour be used as  
885 indicators of welfare in shelter dogs (*Canis lupus familiaris*)? *PLOS ONE*. 2016;11:  
886 e0163620. doi:10.1371/journal.pone.0163620
- 887 54. R Development Core Team. R: a language and environment for statistical computing.  
888 Vienna, Austria: R Foundation for Statistical Computing; 2016. [https://www.r-](https://www.r-project.org/)  
889 [project.org/](https://www.r-project.org/)
- 890 55. Honaker J, King G, Blackwell M. Amelia: A program for missing data. 2015. Version  
891 1.7.4. <https://cran.r-project.org/web/packages/Amelia/vignettes/amelia.pdf>
- 892 56. Asp HE, Fikse WF, Nilsson K, Strandberg E. Breed differences in everyday behaviour  
893 of dogs. *Appl Anim Behav Sci*. 2015;169: 69–77. doi:10.1016/j.applanim.2015.04.010
- 894 57. Rosseel, Y., Oberski, D., Byrnes, J., Vanbrabant, L., Savalei, V., Merkle, E., et al,  
895 *Lavaan: Latent Variable Analysis*. 2016. Version 0.5-22. [https://cran.r-](https://cran.r-project.org/web/packages/lavaan/)  
896 [project.org/web/packages/lavaan/](https://cran.r-project.org/web/packages/lavaan/)
- 897 58. Muthén B, Christoffersson A. Simultaneous factor analysis of dichotomous variables  
898 in several groups. *Psychometrika*. 1981;46: 407–419. doi:10.1007/BF02293798

- 899 59. Muthén B. A general structural equation model with dichotomous, ordered  
900 categorical, and continuous latent variable indicators. *Psychometrika*. 1984;49: 115–  
901 132. doi:10.1007/BF02294210
- 902 60. Jorgensen TD, Pornprasertmanit S, Miller P, Schoemann A, Rosseel Y, Quick C, et al.  
903 *semTools: useful tools for structural equation modeling*. 2016.  
904 <https://rdrr.io/cran/semTools/>
- 905 61. Hermida R. The problem of allowing correlated errors in structural equation  
906 modeling: concerns and considerations. *Comp Method Soc Sci*. 2015;3: 05–17.
- 907 62. Millsap RE, Yun-Tein J. Assessing factorial invariance in ordered-categorical  
908 measures. *Multivariate Behav Res*. 2004;39: 479–515.  
909 doi:10.1207/S15327906MBR3903\_4
- 910 63. Kamata A. Item analysis by the hierarchical generalized linear model. *J Educ Meas*.  
911 2001;38: 79–93. doi:10.1111/j.1745-3984.2001.tb01117.x
- 912 64. Van den Noortgate W, De Boeck P. Assessing and explaining differential item  
913 functioning using logistic mixed models. *J Educ Behav Stat*. 2005;30: 443–464.
- 914 65. Nakagawa S, Schielzeth H. Repeatability for Gaussian and non-Gaussian data: a  
915 practical guide for biologists. *Biol Rev Camb Philos Sci*. 2010;85: 935–956.  
916 doi:10.1111/j.1469-185X.2010.00141.x

- 917 66. Stan Development Team. Stan modeling language users guide and reference  
918 manual. 2016. Version 2.14.0. [https://github.com/stan-](https://github.com/stan-dev/stan/releases/download/v2.14.0/stan-reference-2.14.0.pdf)  
919 [dev/stan/releases/download/v2.14.0/stan-reference-2.14.0.pdf](https://github.com/stan-dev/stan/releases/download/v2.14.0/stan-reference-2.14.0.pdf)
- 920 67. Kruschke JK. Bayesian data analysis. *Wiley Interdiscip Rev: Cogn Sci.* 2010;1: 658–  
921 676. doi:[10.1002/wcs.72](https://doi.org/10.1002/wcs.72)
- 922 68. Vehtari A, Gelman A, Gabry J, Piironen J, Goodrich B. Loo: Efficient leave-one-out  
923 cross-validation and WAIC for Bayesian models. 2016. Version 1.0.0. [https://cran.r-](https://cran.r-project.org/web/packages/loo/loo.pdf)  
924 [project.org/web/packages/loo/loo.pdf](https://cran.r-project.org/web/packages/loo/loo.pdf)
- 925 69. Kruschke J. *Doing Bayesian data analysis: A tutorial with R, JAGS, and Stan.* 2nd ed.  
926 Academic Press; 2014.
- 927 70. Chen JJ, Tsong Y, Kang S-H. Tests for equivalence or noninferiority between two  
928 proportions. *Drug Inf J.* 2000;34: 569–578. doi:[10.1177/009286150003400225](https://doi.org/10.1177/009286150003400225)
- 929 71. Barnard S, Marshall-Pescini S, Passalacqua C, Beghelli V, Capra A, Normando S, et al.  
930 Does subjective rating reflect behavioural coding? Personality in 2 month-old dog  
931 puppies: an open-field test and adjective-based questionnaire. *PLOS ONE.* 2016;11:  
932 e0149831. doi:[10.1371/journal.pone.0149831](https://doi.org/10.1371/journal.pone.0149831)
- 933 72. Ion A, Iliescu D. The measurement equivalence of personality measures across high-  
934 and low-stake test taking settings. *Pers Individ Dif.* 2017;110: 1–6.  
935 doi:[10.1016/j.paid.2017.01.008](https://doi.org/10.1016/j.paid.2017.01.008)

- 936 73. Bowden SC, Saklofske DH, van de Vijver FJR, Sudarshan NJ, Eysenck SBG. Cross-  
937 cultural measurement invariance of the Eysenck Personality Questionnaire across 33  
938 countries. *Pers Individ Dif*. 2016;103: 53–60. doi:10.1016/j.paid.2016.04.028
- 939 74. van den Berg SM, Moor MHM de, McGue M, Pettersson E, Terracciano A, Verweij  
940 KJH, et al. Harmonization of Neuroticism and Extraversion phenotypes across  
941 inventories and cohorts in the Genetics of Personality Consortium: an application of  
942 item response theory. *Behav Genet*. 2014;44: 295–313. doi:10.1007/s10519-014-9654-x
- 943 75. Budaev S, Brown C. Personality traits and behaviour. In: Brown C, Laland K, Krause J,  
944 editors. *Fish cognition and behavior*. Wiley-Blackwell; 2011. pp. 135–165.
- 945 76. Campbell DT, Fiske DW. Convergent and discriminant validation by the multitrait-  
946 multimethod matrix. *Psychol Bull*. 1959;56: 81–105. doi:10.1037/h0046016
- 947 77. Carter AJ, Feeney WE, Marshall HH, Cowlshaw G, Heinsohn R. Animal personality:  
948 what are behavioural ecologists measuring? *Biol Rev Camb Philos Soc*. 2013;88: 465–  
949 475. doi:10.1111/brv.12007
- 950 78. Podsakoff PM, MacKenzie SB, Lee J-Y, Podsakoff NP. Common method biases in  
951 behavioral research: a critical review of the literature and recommended remedies. *J*  
952 *Appl Psychol*. 2003;88: 879–903. doi:10.1037/0021-9010.88.5.879
- 953 79. Cole DA, Ciesla JA, Steiger JH. The insidious effects of failing to include design-driven  
954 correlated residuals in latent-variable covariance structure analysis. *Psychol Methods*.  
955 2007;12: 381–398. doi:10.1037/1082-989X.12.4.381

- 956 80. Yen WM. Scaling performance assessments: strategies for managing local item  
957 dependence. *J Educ Meas.* 1993;30: 187–213. doi:10.1111/j.1745-3984.1993.tb00423.x
- 958 81. Carter AJ, Marshall HH, Heinsohn R, Cowlshaw G. How not to measure boldness:  
959 novel object and antipredator responses are not the same in wild baboons. *Anim Behav.*  
960 2012;84: 603–609. doi:10.1016/j.anbehav.2012.06.015
- 961 82. Cramer AOJ, van der Sluis S, Noordhof A, Wichers M, Geschwind N, Aggen SH, et al.  
962 Dimensions of normal personality as networks in search of equilibrium: you can't like  
963 parties if you don't like people. *Eur J Pers.* 2012;26: 414–431. doi:10.1002/per.1866
- 964 83. Schmittmann VD, Cramer AOJ, Waldorp LJ, Epskamp S, Kievit RA, Borsboom D.  
965 Deconstructing the construct: a network perspective on psychological phenomena. *New*  
966 *Ideas Psychol.* 2013;31: 43–53. doi:10.1016/j.newideapsych.2011.02.007
- 967 84. Hamaker EL, Nesselroade JR, Molenaar PCM. The integrated trait-state model. *J Res*  
968 *Pers.* 2007;41: 295–315. doi:10.1016/j.jrp.2006.04.003
- 969 85. Fadel FR, Driscoll P, Pilot M, Wright H, Zulch H, Mills D. Differences in trait  
970 impulsivity indicate diversification of dog breeds into working and show lines. *Sci Rep.*  
971 2016;6. doi:10.1038/srep22162
- 972 86. Schimmack U. What multi-method data tell us about construct validity. *Eur J Pers.*  
973 2010;24: 241–257. doi:10.1002/per.771



- 974 87. Duckworth RA. Neuroendocrine mechanisms underlying behavioral stability:  
975 implications for the evolutionary origin of personality. *Ann N Y Acad Sci.* 2015;1360: 54–  
976 74. doi:10.1111/nyas.12797
- 977 88. Koski SE. How to measure animal personality and why does It matter? Integrating  
978 the psychological and biological approaches to animal personality. In: Inoue-Murayama  
979 M, Kawamura S, Weiss A, editors. *From Genes to Animal Behavior.* Springer Japan; 2011.  
980 pp. 115–136. doi:10.1007/978-4-431-53892-9\_5
- 981 89. D. *Measuring the mind: Conceptual issues in contemporary psychometrics.*  
982 Cambridge University Press; 2005.
- 983 90. Maul A, Torres Iribarra D, Wilson M. On the philosophical foundations of  
984 psychological measurement. *Measurement.* 2016;79: 311–320.  
985 doi:10.1016/j.measurement.2015.11.001
- 986 91. Molenaar PCM. A manifesto on psychology as idiographic science: bringing the  
987 person back into scientific psychology, this time forever. *Measurement.* 2004;2: 201–  
988 218. doi:10.1207/s15366359mea0204\_1
- 989 92. Adolf J, Schuurman NK, Borkenau P, Borsboom D, Dolan CV. Measurement  
990 invariance within and between individuals: a distinct problem in testing the equivalence  
991 of intra- and inter-individual model structures. *Front Psychol.* 2014;5.  
992 doi:10.3389/fpsyg.2014.00883

- 993 93. Stamps JA, Briffa M, Biro PA. Unpredictable animals: individual differences in  
994 intraindividual variability (IIV). *Anim Behav.* 2012;83: 1325–1334.  
995 doi:10.1016/j.anbehav.2012.02.017
- 996 94. Biro PA, Stamps JA. Using repeatability to study physiological and behavioural traits:  
997 ignore time-related change at your peril. *Anim Behav.* 2015;105: 223–230.  
998 doi:10.1016/j.anbehav.2015.04.008
- 999
- 1000

## 1001 **Supporting Information**

1002 **Table S1. Counts of aggression per context.** The number of dogs who had 0, 1, and > 1  
1003 counts of aggression.

1004

1005 **Table S2. Tetrachoric correlations between aggression contexts.** Tetrachoric  
1006 correlations between aggression contexts on the raw binary data, before the multiple  
1007 imputation. Abbreviations used: HND (*Handling*); FPL (*Interactions with familiar people*);  
1008 UPL (*Interactions with unfamiliar people*); KD (*In kennel towards dogs*); KP (*In kennel*  
1009 *towards people*); OKD (*Out of kennel towards dogs*); OKP (*Out of kennel towards*  
1010 *people*); EAT (*Eating food*); TOY (*Interactions with toys*); DM (*Interactions with male*  
1011 *dogs*); DF (*Interactions with female dogs*).

1012

1013 **Table S3. Bayesian hierarchical model parameter estimates for aggression towards**  
1014 **people in different contexts.** Mean and 95% credibility interval (CI) estimates for all  
1015 parameters from the Bayesian hierarchical logistic model assessing measurement  
1016 invariance for contexts reflecting aggressiveness towards people. Differences between  
1017 levels of categorical variables are indicated by ‘.v.’ in the parameter name; interactions  
1018 are denoted with ‘\*’ in the parameter name. The decision rule for each parameter is  
1019 given except for those variables not interpreted inferentially: YES = 95% CI falls

1020 completely outside the region of practical equivalence (ROPE); NULL = 95% CI falls

1021 completely inside the ROPE; ROPE = 95% CI partly covers the ROPE.

1022

1023 **Table S4. Bayesian hierarchical model parameter estimates for aggression towards**

1024 **dogs in different contexts.** Mean and 95% credibility interval (CI) estimates for all

1025 parameters from the Bayesian hierarchical logistic model assessing measurement

1026 invariance for contexts reflecting aggressiveness towards dogs. Differences between

1027 levels of categorical variables are indicated by '.v.' in the parameter name; interactions

1028 are denoted with '\*' in the parameter name. The decision rule for each parameter is

1029 given except for those variables not interpreted inferentially: YES = 95% CI falls

1030 completely outside the region of practical equivalence (ROPE); NULL = 95% CI falls

1031 completely inside the ROPE; ROPE = 95% CI partly covers the ROPE.

1032
